# Supplementary material for: From plants to minerals: depth-dependent controls on microbial carbon use efficiency across the global
Source: Research Square preprint supplement (doi:10.21203/rs.3.rs-8625878/v1), 2026-02-11
Supplement: Supplementary file 1 [file 734ab0efadc68587604cd84d.pdf]

**Title:** From plants to minerals: depth-dependent controls on microbial carbon use efficiency across the global

Yaqin Guo <sup>a, b</sup>, Yongxing Cui <sup>a, b\*</sup>, Tessa Camenzind <sup>a, c</sup>, Matthias C. Rillig <sup>a, b</sup>

<sup>a</sup> Institute of Biology, Freie Universität Berlin, Altensteinstraße 6, 14195 Berlin, Germany

<sup>b</sup> Berlin-Brandenburg Institute of Advanced Biodiversity Research (BBIB), Berlin, Germany

<sup>c</sup> Department of Soil Biology, University of Hohenheim, Emil-Wolff-Straße 27, 70593 Stuttgart, Germany

**Contents of this file:**

Supplementary Figures: Fig. S1 to Fig. S12

Supplementary Tables: Table S1 to Table S5

Supplementary References

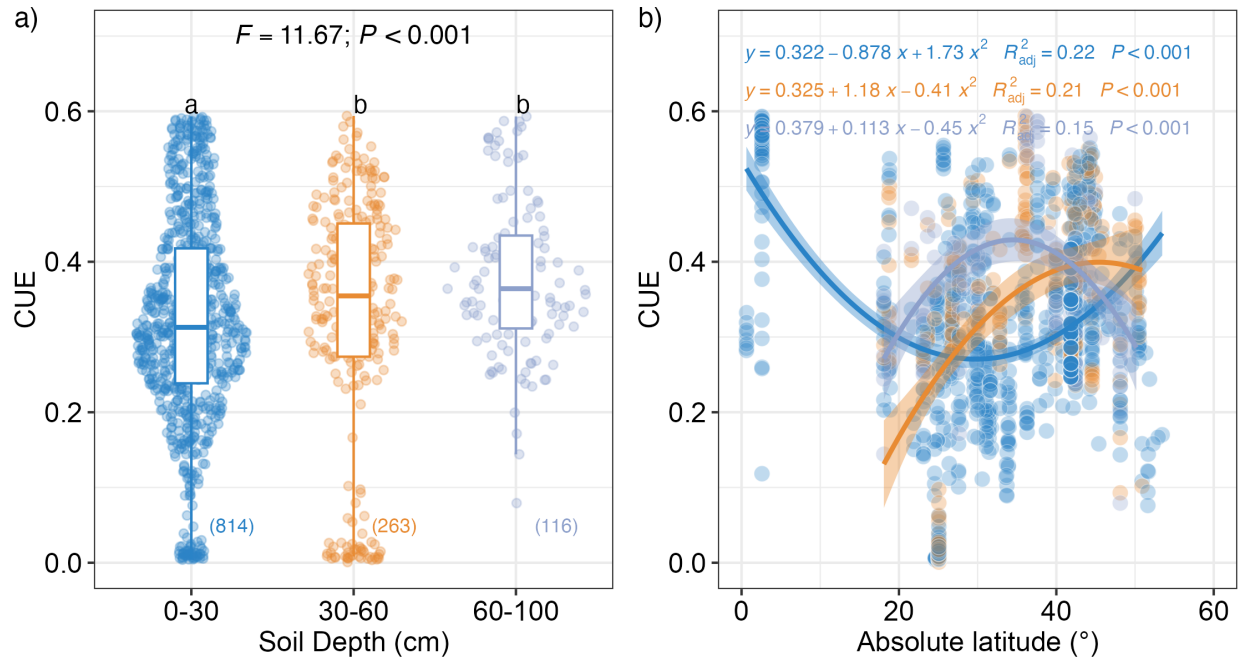

**Fig. S1** a) Differences in CUE among 0-30 cm, 30-60 cm, and 60-100 cm. Mean values are 0.35 (0.31-0.38), 0.37 (0.33-0.41), and 0.38 (0.34-0.42), respectively. The boxes represent the first and the third quartiles. The line within the box represents the median. The whiskers represent the data range and points indicate individual values. Different letters denote significant differences ( $P < 0.05$ ) based on the analysis of linear mixed-effect models followed by estimated marginal means test. b) Latitudinal patterns of CUE fitted by quadratic models in three layers, respectively. Formulas and adjust coefficient were annotated in the plot;  $P < 0.001$  indicate statistically significant of the overall regression model.

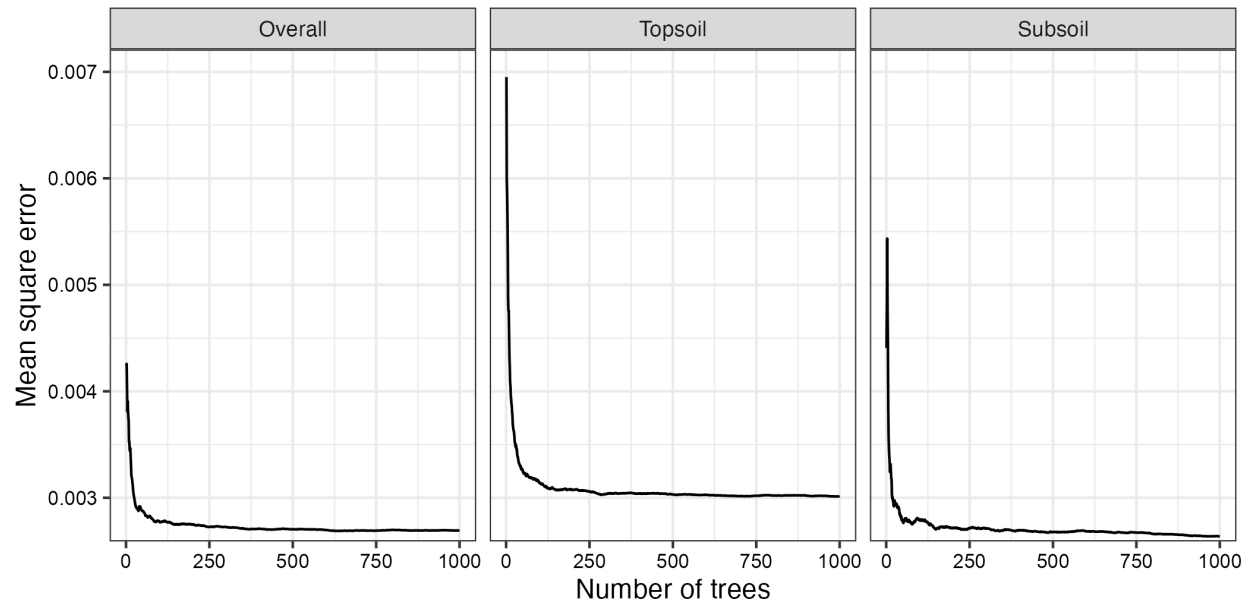

**Fig. S2** Changes in the mean squared error of predicted values with the number of regression trees in random forest modeling based on sampling sites. The curves, which steadily approach the horizontal, indicating that 1000 regression trees are sufficient for structuring prediction models. Note: Overall means topsoils and subsoils together.

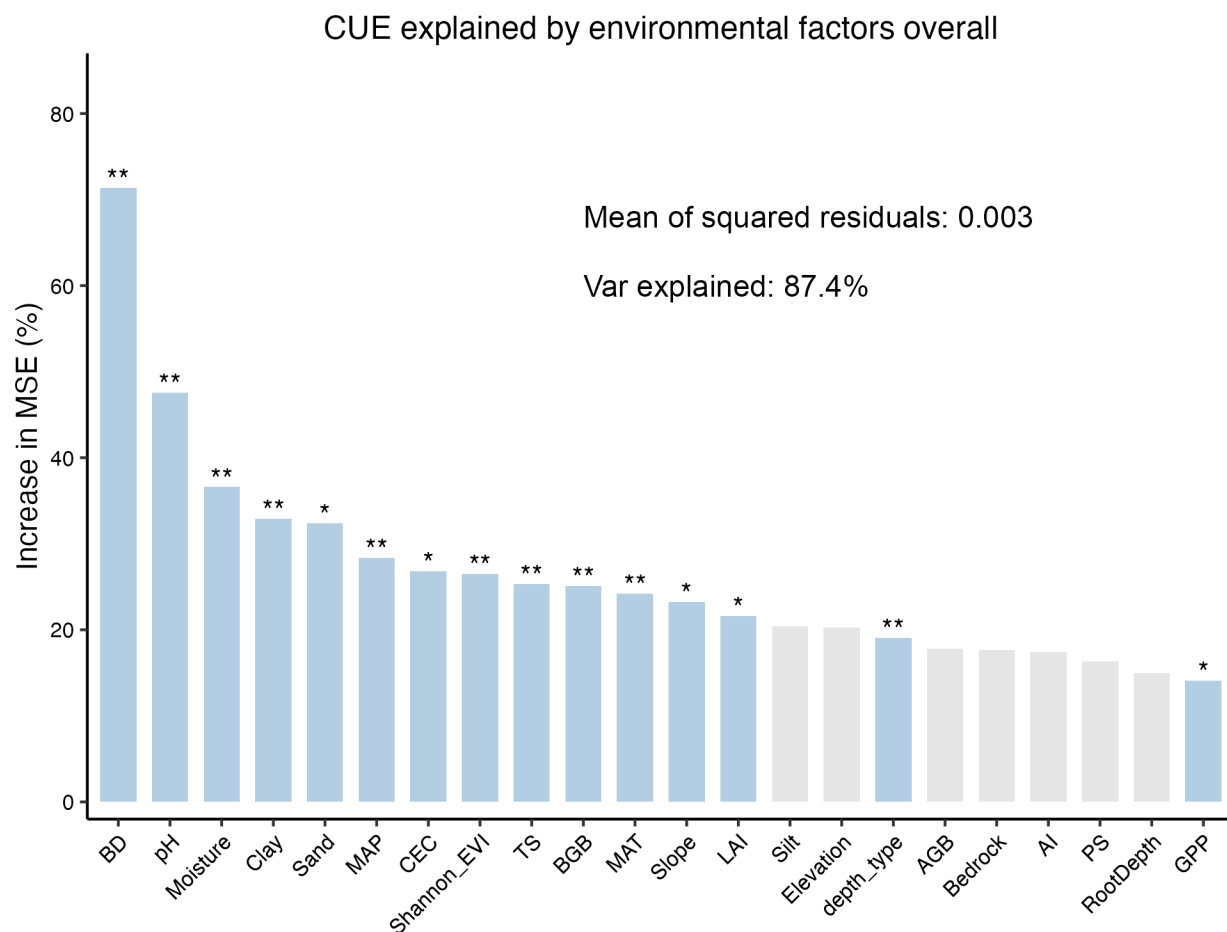

**Fig. S3** Random Forest analysis identifies important variables when combined both topsoils and subsoils named as overall. MAT: mean annual temperature; MAP: mean annual precipitation; TS: temperature seasonality; PS: precipitation seasonality; AI: aridity index; GPP: gross primary production; LAI: leaf area index; AGB: aboveground biomass; BGB: belowground biomass; BD: bulk density; CEC: cation exchange capacity.

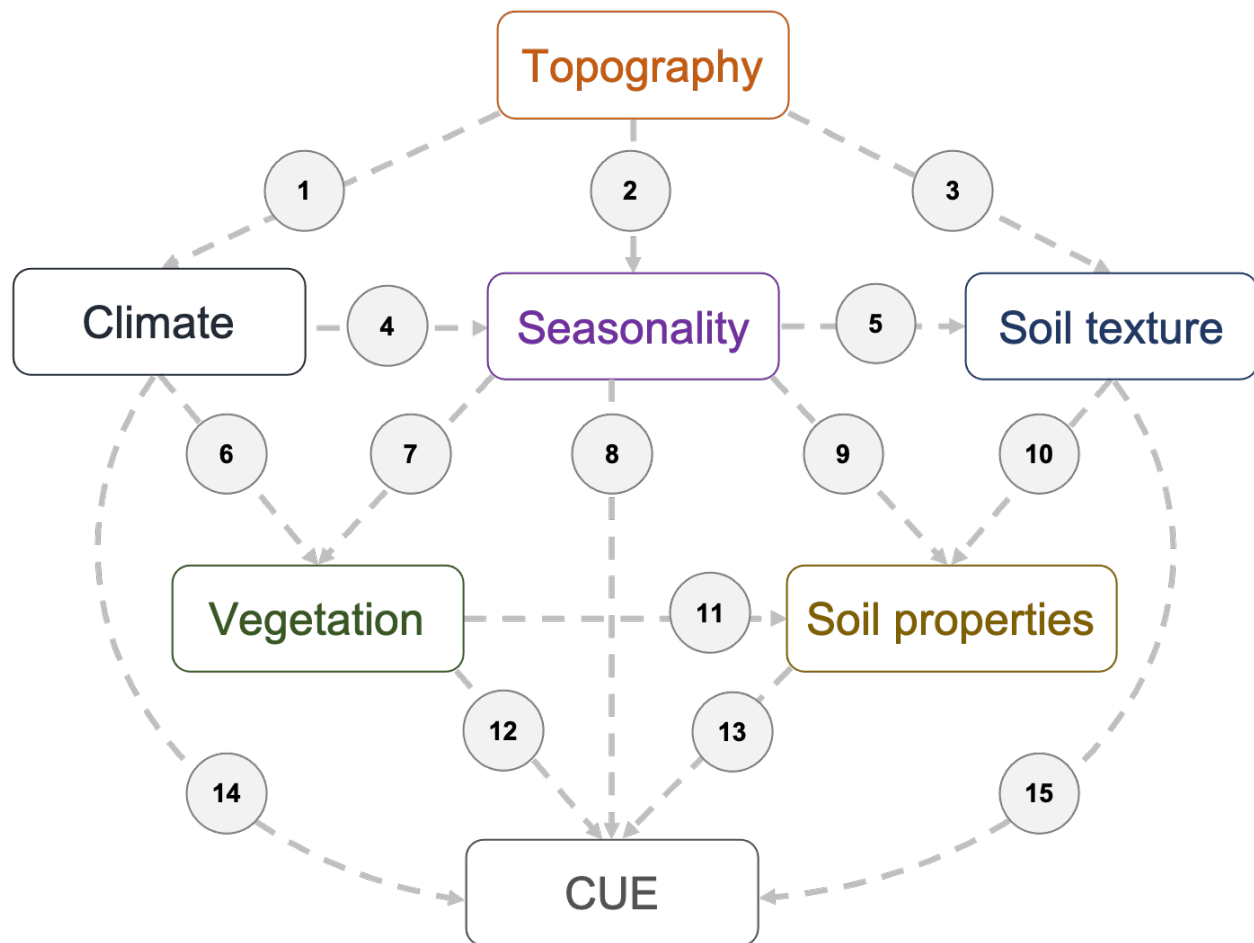

| # | Factor                     | Rationale                                                                                                                                                                                                                                                                                                                    |
|---|----------------------------|------------------------------------------------------------------------------------------------------------------------------------------------------------------------------------------------------------------------------------------------------------------------------------------------------------------------------|
| 1 | Topography → Climate       | Topography influences local climate by altering temperature and precipitation patterns. Temperature typically decreases by about 6.5°C for every 1,000 m increase in elevation due to adiabatic cooling, while higher elevations and steeper, windward slopes often receive more precipitation because of orographic uplift. |
| 2 | Topography → Seasonality   | Topography affects climate seasonality by enhancing thermal and moisture contrasts. Higher elevations show greater temperature seasonality due to stronger radiative cooling, while elevation and slope increase precipitation seasonality through intensified orographic uplift during wet seasons.                         |
| 3 | Topography → Soil texture  | Topography is a crucial factor influencing soil clay content, as it governs weathering intensity, erosion, and sediment deposition. Higher elevations and steeper slopes usually have coarser soils due to greater erosion, while lower elevations and gentle slopes accumulate finer materials.                             |
| 4 | Climate → Seasonality      | Climate strongly affects seasonality patterns. Regions with higher MAT show lower temperature seasonality, while cooler area experience greater variation. Similarly, regions with higher MAP tend to have more evenly distributed rainfall, whereas drier climates exhibit stronger wet-dry seasonality.                    |
| 5 | Seasonality → Soil texture | Seasonality affects soil clay content by regulating weathering and erosion. For example, strong temperature and precipitation seasonality enhance weathering and runoff, reducing clay formation.                                                                                                                            |

|    |                                   |                                                                                                                                                                                                            |
|----|-----------------------------------|------------------------------------------------------------------------------------------------------------------------------------------------------------------------------------------------------------|
| 6  | Climate →<br>vegetation           | Climate is a primary determinant of vegetation distribution and productivity. Higher MAT promotes plant growth where moisture is adequate, while MAP determines water availability and vegetation density. |
| 7  | Seasonality →<br>Vegetation       | Climate seasonality greatly affects the growth, reproduction, and survival of plants by periodic changes in temperature and precipitation.                                                                 |
| 8  | Seasonality →<br>CUE              | Seasonality can influence temperature and moisture variations, thus shaping microbial use efficiency.                                                                                                      |
| 9  | Seasonality →<br>Soil properties  | Seasonality influences soil properties such as pH and BD by controlling moisture and temperature fluctuations that affect leaching, organic matter decomposition, and soil structure.                      |
| 10 | Soil texture →<br>Soil properties | Soil clay or sand content strongly influences pH, DB and water holding capacity by affecting ion exchange capacity, porosity, and soil structure.                                                          |
| 11 | Vegetation →<br>Soil properties   | Vegetation can influence soil properties via root exudates, litter input. For example, BD is strongly related to organic matter.                                                                           |
| 12 | Vegetation →<br>CUE               | Vegetations strongly influence microbial CUE by regulating the quantity and quality of organic carbon inputs to the soil.                                                                                  |
| 13 | Soil properties →<br>CUE          | Soil properties strongly regulate microbial CUE by influencing nutrient availability, aeration, and habitat conditions.                                                                                    |
| 14 | Climate →<br>CUE                  | Climate will change temperature and moisture adaptation of microbial communities, thereby influencing microbial carbon use efficiency.                                                                     |
| 15 | Soil texture →<br>CUE             | Different clay or sand content will affect substrate absorption and accessibility, thus affecting carbon use efficiency.                                                                                   |

**Fig. S4** *A priori* path model (modified from the framework in (Cui et al. 2025)) illustrating the direct and indirect effects of key environmental factors on soil microbial carbon use efficiency (CUE). In our study, we employed the same modeling to test the casual relationships between environmental factors and CUE in both topsoils and subsoils. While topsoils and subsoils are subject to the same topography, climate, seasonality, and vegetation influences, they may differ in their responses due to variations in soil buffer capacity rather than in exposure to different climate conditions. Although we acknowledge potential differences in plant carbon (C) allocation to subsoils, our analysis focuses on overall ecosystem productivity. The estimation of C allocation to subsoils could be approached by the available model (Luo et al. 2019), but their accuracy is limited by insufficient empirical data for robust parameterization. MAT: mean annual temperature; MAP: mean annual precipitation; BD: bulk density.

**Table S1** Detailed results of path analysis modeling on a global scale in topsoils**MODEL SPECIFICATION**

|    |                       |                   |
|----|-----------------------|-------------------|
| 1  | Number of Cases       | 814               |
| 2  | Latent Variables      | 7                 |
| 3  | Manifest Variables    | 15                |
| 4  | Scale of Data         | Standardized Data |
| 5  | Non-Metric PLS        | FALSE             |
| 6  | Weighting Scheme      | centroid          |
| 7  | Tolerance Crit        | 1e-06             |
| 8  | Max Num Iters         | 100               |
| 9  | Convergence Iters     | 6                 |
| 10 | Bootstrapping         | FALSE             |
| 11 | Bootstrapping samples | NULL              |

**BLOCK DEFINITION**

|   | Block           | Type       | Size | Mode |
|---|-----------------|------------|------|------|
| 1 | Topography      | Exogenous  | 2    | A    |
| 2 | Climate         | Endogenous | 2    | A    |
| 3 | Season          | Endogenous | 2    | A    |
| 4 | Soil texture    | Endogenous | 1    | A    |
| 5 | Vegetation      | Endogenous | 3    | B    |
| 6 | Soil properties | Endogenous | 3    | B    |
| 7 | CUE             | Endogenous | 1    | A    |

**BLOCKS UNIDIMENSIONALITY**

|                 | Mode | MVs | C.alpha | DG.rho | eig.1st | eig.2nd |
|-----------------|------|-----|---------|--------|---------|---------|
| Topography      | A    | 2   | 0.641   | 0.848  | 1.470   | 0.529   |
| Climate         | A    | 2   | 0.770   | 0.897  | 1.630   | 0.374   |
| Season          | A    | 2   | 0.866   | 0.937  | 1.760   | 0.237   |
| Soil texture    | A    | 1   | 1.000   | 0.000  | 1.500   | 0.499   |
| Vegetation      | B    | 3   | 0.000   | 0.000  | 1.690   | 1.003   |
| Soil properties | B    | 3   | 0.000   | 0.000  | 1.180   | 1.027   |
| CUE             | A    | 1   | 1.000   | 1.000  | 1.000   | 0.000   |

**OUTER MODEL**

|            |             | Weight | Loading | Communality | Redundancy |
|------------|-------------|--------|---------|-------------|------------|
| topography |             |        |         |             |            |
| 1          | Elevation   | 0.962  | 0.998   | 0.996       | 0.000      |
| 1          | Slope       | 0.067  | 0.523   | 0.273       | 0.000      |
| climate    |             |        |         |             |            |
| 2          | MAT         | 0.610  | 0.921   | 0.850       | 0.184      |
| 2          | MAP         | 0.497  | 0.880   | 0.773       | 0.168      |
| season     |             |        |         |             |            |
| 3          | PS          | 0.502  | 0.931   | 0.868       | 0.706      |
| 3          | TS          | 0.563  | 0.946   | 0.895       | 0.728      |
| texture    |             |        |         |             |            |
| 4          | Clay        | 0.705  | -0.925  | 0.855       | 0.329      |
| 4          | Sand        | 0.563  | 0.946   | 0.895       | 0.728      |
| vegetation |             |        |         |             |            |
| 5          | GPP         | 0.901  | 0.994   | 0.988       | 0.593      |
| 5          | BGB         | 0.117  | 0.483   | 0.233       | 0.140      |
| 5          | Shannon_EVI | -0.08  | -0.581  | 0.337       | 0.202      |
| soil       |             |        |         |             |            |
| 6          | BD          | -0.021 | 0.061   | 0.004       | 0.001      |
| 6          | pH          | 1.008  | -0.994  | 0.989       | 0.228      |



|     |          |       |       |       |       |
|-----|----------|-------|-------|-------|-------|
| 6   | Moisture | 0.101 | 0.036 | 0.001 | 0.000 |
| CUE |          |       |       |       |       |
| 7   | CUE      | 1.000 | 1.000 | 1.000 | 0.222 |

## CROSSLOADINGS

|            |             | topography | climate | season | texture | vegetation | soil   | CUE    |
|------------|-------------|------------|---------|--------|---------|------------|--------|--------|
| topography |             |            |         |        |         |            |        |        |
| 1          | Elevation   | 0.998      | -0.478  | 0.142  | 0.318   | -0.349     | -0.259 | -0.164 |
| 1          | Slope       | 0.523      | -0.057  | -0.108 | 0.117   | -0.154     | 0.182  | -0.296 |
| climate    |             |            |         |        |         |            |        |        |
| 2          | MAT         | -0.460     | 0.922   | -0.831 | -0.544  | 0.762      | 0.311  | 0.112  |
| 2          | MAP         | -0.372     | 0.880   | -0.688 | -0.433  | 0.594      | 0.566  | 0.112  |
| season     |             |            |         |        |         |            |        |        |
| 3          | PS          | 0.193      | -0.746  | 0.932  | 0.502   | -0.569     | -0.363 | -0.065 |
| 3          | TS          | 0.058      | -0.846  | 0.946  | 0.566   | -0.778     | -0.343 | -0.144 |
| texture    |             |            |         |        |         |            |        |        |
| 4          | Clay        | -0.301     | 0.539   | -0.554 | 0.502   | -0.569     | -0.363 | -0.065 |
| 4          | Sand        | 0.234      | -0.381  | 0.409  | 0.566   | -0.778     | -0.343 | -0.144 |
| vegetation |             |            |         |        |         |            |        |        |
| 5          | GPP         | -0.338     | 0.772   | -0.729 | -0.663  | 0.994      | 0.398  | 0.321  |
| 5          | BGB         | -0.001     | 0.183   | -0.284 | -0.494  | 0.483      | 0.580  | 0.032  |
| 5          | Shannon_EVI | 0.517      | -0.527  | 0.410  | 0.408   | -0.581     | -0.102 | -0.258 |
| Soil       |             |            |         |        |         |            |        |        |
| 6          | BD          | -0.250     | 0.343   | -0.150 | 0.054   | 0.066      | 0.061  | 0.080  |
| 6          | pH          | 0.201      | -0.447  | 0.371  | 0.436   | -0.414     | -0.994 | 0.115  |
| 6          | Moisture    | 0.295      | -0.131  | -0.021 | 0.027   | -0.161     | 0.036  | -0.215 |
| CUE        |             |            |         |        |         |            |        |        |
| 7          | CUE         | -0.179     | 0.124   | -0.113 | -0.302  | 0.314      | -0.093 | 1.000  |

## INNER MODEL

|              |           |            |           |           |
|--------------|-----------|------------|-----------|-----------|
| \$climate    |           |            |           |           |
|              | Estimate  | Std. Error | t value   | Pr(> t )  |
| Intercept    | -1.08e-15 | 0.031      | -3.49e-14 | 1.00e+00  |
| topography   | -4.66e-01 | 0.031      | -1.50e+01 | 4.19e-45  |
| \$season     |           |            |           |           |
|              | Estimate  | Std. Error | t value   | Pr(> t )  |
| Intercept    | -1.06e-15 | 0.015      | -6.99e-14 | 1.00e+00  |
| topography   | -3.40e-01 | 0.017      | -1.98e+01 | 1.19e-71  |
| climate      | -1.01e+00 | 0.017      | -5.88e+01 | 1.18e-294 |
| \$texture    |           |            |           |           |
|              | Estimate  | Std. Error | t value   | Pr(> t )  |
| Intercept    | -8.12e-17 | 0.028      | -2.95e-15 | 1.00e+00  |
| topography   | 2.45e-01  | 0.029      | 8.81e+00  | 7.46e-18  |
| season       | 5.39e-01  | 0.029      | 1.94e+01  | 4.32e-69  |
| \$vegetation |           |            |           |           |
|              | Estimate  | Std. Error | t value   | Pr(> t )  |
| Intercept    | 7.51e-16  | 0.022      | 3.38e-14  | 1.00e+00  |
| climate      | 5.25e-01  | 0.042      | 1.24e+01  | 1.20e-32  |
| season       | -2.78e-01 | 0.042      | -6.59e+00 | 8.16e-11  |
| \$soil       |           |            |           |           |
|              | Estimate  | Std. Error | t value   | Pr(> t )  |
| Intercept    | -4.76e-16 | 0.031      | -1.54e-14 | 1.00e+00  |
| season       | -8.88e-02 | 0.045      | -1.97e+00 | 4.95e-02  |
| texture      | -2.57e-01 | 0.043      | -5.97e+00 | 3.59e-09  |

|            |           |            |           |          |
|------------|-----------|------------|-----------|----------|
| vegetation | 1.94e-01  | 0.051      | 3.78e+00  | 1.66e-04 |
| \$CUE      |           |            |           |          |
|            | Estimate  | Std. Error | t value   | Pr(> t ) |
| Intercept  | -3.58e-16 | 0.031      | -1.15e-14 | 1.00e+00 |
| climate    | -2.30e-02 | 0.067      | -3.46e-01 | 7.30e-01 |
| season     | 2.27e-01  | 0.062      | 3.69e+00  | 2.41e-04 |
| texture    | -2.78e-01 | 0.045      | -6.24e+00 | 7.01e-10 |
| vegetation | 4.39e-01  | 0.056      | 7.89e+00  | 1.01e-14 |
| soil       | -3.10e-01 | 0.037      | -8.47e+00 | 1.13e-16 |

#### CORRELATIONS BETWEEN LVs

|            | Topography | Climate | Season | Texture | Vegetation | Soil   | CUE    |
|------------|------------|---------|--------|---------|------------|--------|--------|
| Topography | 1.000      | -0.466  | 0.130  | 0.315   | -0.347     | -0.238 | -0.179 |
| Climate    | -0.466     | 1.000   | -0.848 | -0.547  | 0.761      | 0.471  | 0.124  |
| Season     | 0.130      | -0.850  | 1.000  | 0.571   | -0.724     | -0.375 | -0.113 |
| Texture    | 0.315      | -0.547  | -0.553 | 1.000   | -0.689     | -0.441 | -0.302 |
| Vegetation | -0.347     | 0.761   | 0.358  | -0.689  | 1.000      | 0.435  | 0.314  |
| Soil       | -0.237     | 0.471   | -0.626 | -0.441  | -0.434     | 1.000  | -0.093 |
| CUE        | -0.179     | 0.124   | -0.113 | -0.302  | 0.314      | -0.093 | 1.000  |

#### SUMMARY INNER MODEL

|            | Type       | R <sub>2</sub> | Block_Community | Mean_Redundancy | AVE   |
|------------|------------|----------------|-----------------|-----------------|-------|
| Topography | Exogenous  | 0.000          | 0.635           | 0.000           | 0.635 |
| Climate    | Endogenous | 0.217          | 0.812           | 0.176           | 0.812 |
| Season     | Endogenous | 0.813          | 0.881           | 0.717           | 0.881 |
| Texture    | Endogenous | 0.384          | 0.742           | 0.285           | 0.742 |
| Vegetation | Endogenous | 0.600          | 0.519           | 0.312           | 0.000 |
| Soil       | Endogenous | 0.230          | 0.331           | 0.076           | 0.000 |
| CUE        | Endogenous | 0.222          | 1.000           | 0.222           | 1.000 |

| GOODNESS-OF-FIT |
|-----------------|
| [1] 0.505       |

#### TOTAL EFFECTS

|    | relationships            | direct | indirect | total  |
|----|--------------------------|--------|----------|--------|
| 1  | topography -> climate    | -0.466 | 0.000    | -0.466 |
| 2  | topography -> season     | -0.340 | 0.470    | 0.130  |
| 3  | topography -> texture    | 0.245  | 0.070    | 0.315  |
| 4  | topography -> vegetation | 0.000  | -0.281   | -0.281 |
| 5  | topography -> soil       | 0.000  | -0.147   | -0.147 |
| 6  | topography -> CUE        | 0.000  | -0.125   | -0.125 |
| 7  | climate -> season        | -1.009 | 0.000    | -1.009 |
| 8  | climate -> texture       | 0.000  | -0.543   | -0.543 |
| 9  | climate -> vegetation    | 0.525  | 0.280    | 0.805  |
| 10 | climate -> soil          | 0.000  | 0.385    | 0.385  |
| 11 | climate -> CUE           | -0.023 | 0.156    | 0.133  |
| 12 | season -> texture        | 0.539  | 0.000    | 0.539  |
| 13 | season -> vegetation     | -0.278 | 0.000    | -0.278 |
| 14 | season -> soil           | -0.089 | -0.192   | -0.281 |
| 15 | season -> CUE            | 0.227  | -0.185   | 0.043  |
| 16 | texture -> vegetation    | 0.000  | 0.000    | 0.000  |

|    |                    |        |        |        |
|----|--------------------|--------|--------|--------|
| 17 | texture -> soil    | -0.257 | 0.000  | -0.257 |
| 18 | texture -> CUE     | -0.278 | 0.080  | -0.198 |
| 19 | vegetation -> soil | 0.194  | 0.000  | 0.194  |
| 20 | vegetation -> CUE  | 0.440  | -0.060 | 0.380  |
| 21 | soil -> CUE        | -0.310 | 0.000  | -0.310 |

**Table S2** Detailed results of path analysis modeling on a global scale in subsoils

#### MODEL SPECIFICATION

|    |                       |                   |
|----|-----------------------|-------------------|
| 1  | Number of Cases       | 379               |
| 2  | Latent Variables      | 7                 |
| 3  | Manifest Variables    | 15                |
| 4  | Scale of Data         | Standardized Data |
| 5  | Non-Metric PLS        | FALSE             |
| 6  | Weighting Scheme      | centroid          |
| 7  | Tolerance Crit        | 1e-06             |
| 8  | Max Num Iters         | 100               |
| 9  | Convergence Iters     | 7                 |
| 10 | Bootstrapping         | FALSE             |
| 11 | Bootstrapping samples | NULL              |

#### BLOCKDEFINITION

|   | Block      | Type       | Size | Mode |
|---|------------|------------|------|------|
| 1 | Topography | Exogenous  | 2    | A    |
| 2 | Climate    | Endogenous | 2    | A    |
| 3 | Season     | Endogenous | 2    | A    |
| 4 | Texture    | Endogenous | 1    | A    |
| 5 | Vegetation | Endogenous | 3    | B    |
| 6 | Soil       | Endogenous | 3    | B    |
| 7 | CUE        | Endogenous | 1    | A    |

#### BLOCKS UNIDIMENSIONALITY

|            | Mode | MVs | C.alpha | DG.rho   | eig.1st | eig.2nd |
|------------|------|-----|---------|----------|---------|---------|
| Topography | A    | 2   | 0.256   | 7.29e-01 | 1.150   | 0.853   |
| Climate    | A    | 2   | 0.929   | 9.66e-01 | 1.870   | 0.133   |
| Season     | A    | 2   | 0.793   | 8.84e-01 | 1.590   | 0.414   |
| Texture    | A    | 1   | 0.000   | 2.36e-32 | 1.480   | 0.522   |
| Vegetation | B    | 3   | 0.000   | 0.00e+00 | 1.250   | 1.128   |
| Soil       | B    | 3   | 0.000   | 0.00e+00 | 1.260   | 0.925   |
| CUE        | A    | 1   | 1.000   | 1.00e+00 | 1.000   | 0.000   |

#### OUTER MODEL

|            |           | Weight | Loading | Communality | Redundancy |
|------------|-----------|--------|---------|-------------|------------|
| topography |           |        |         |             |            |
| 1          | Elevation | 0.602  | 0.707   | 0.500       | 0.000      |
| 1          | Slope     | 0.715  | 0.803   | 0.645       | 0.000      |
| climate    |           |        |         |             |            |
| 2          | MAT       | 0.523  | 0.967   | 0.935       | 0.015      |
| 2          | MAP       | 0.512  | 0.965   | 0.932       | 0.015      |
| season     |           |        |         |             |            |
| 3          | PS        | 0.434  | 0.833   | 0.695       | 0.015      |
| 3          | TS        | 0.682  | 0.936   | 0.932       | 0.015      |

|            |             |        |        |       |       |
|------------|-------------|--------|--------|-------|-------|
| texture    |             |        |        |       |       |
| 4          | Clay        | 0.787  | -0.952 | 0.907 | 0.051 |
| 4          | Sand        | -0.347 | 0.723  | 0.522 | 0.030 |
| vegetation |             |        |        |       |       |
| 5          | GPP         | 0.832  | 0.917  | 0.841 | 0.542 |
| 5          | BGB         | 0.417  | 0.491  | 0.241 | 0.155 |
| 5          | Shannon_EVI | -0.152 | -0.212 | 0.045 | 0.029 |
| soil       |             |        |        |       |       |
| 6          | BD          | -0.111 | 0.240  | 0.058 | 0.035 |
| 6          | pH          | 0.982  | -0.993 | 0.986 | 0.591 |
| 6          | Moisture    | 0.060  | 0.033  | 0.001 | 0.001 |
| CUE        |             |        |        |       |       |
| 7          | CUE         | 1.000  | 1.000  | 1.000 | 0.388 |

## CROSSLLOADINGS

|            |             | topography | climate | season | texture | vegetation | soil   | CUE    |
|------------|-------------|------------|---------|--------|---------|------------|--------|--------|
| topography |             |            |         |        |         |            |        |        |
| 1          | Elevation   | 0.707      | -0.486  | 0.140  | 0.062   | -0.354     | -0.393 | 0.351  |
| 1          | Slope       | 0.803      | 0.232   | -0.363 | -0.206  | 0.164      | 0.254  | -0.029 |
| climate    |             |            |         |        |         |            |        |        |
| 2          | MAT         | -0.178     | 0.967   | -0.820 | -0.145  | 0.743      | 0.581  | -0.411 |
| 2          | MAP         | -0.065     | 0.966   | -0.806 | -0.262  | 0.800      | 0.799  | -0.438 |
| season     |             |            |         |        |         |            |        |        |
| 3          | PS          | -0.011     | -0.603  | 0.833  | 0.127   | -0.374     | -0.508 | 0.260  |
| 3          | TS          | -0.251     | -0.852  | 0.936  | 0.252   | -0.679     | -0.616 | 0.307  |
| texture    |             |            |         |        |         |            |        |        |
| 4          | Clay        | 0.125      | 0.267   | -0.261 | -0.952  | 0.246      | 0.449  | 0.026  |
| 4          | Sand        | -0.035     | -0.002  | 0.063  | 0.723   | 0.029      | -0.220 | -0.062 |
| soil       |             |            |         |        |         |            |        |        |
| 5          | GPP         | -0.123     | 0.822   | -0.620 | -0.114  | 0.917      | 0.525  | -0.345 |
| 5          | BGB         | 0.112      | 0.182   | -0.234 | -0.308  | 0.491      | 0.536  | -0.286 |
| 5          | Shannon_EVI | 0.268      | -0.250  | 0.076  | -0.258  | -0.212     | -0.030 | 0.180  |
| vegetation |             |            |         |        |         |            |        |        |
| 6          | BD          | -0.286     | 0.360   | -0.232 | -0.058  | 0.205      | 0.240  | -0.049 |
| 6          | pH          | 0.021      | -0.687  | 0.632  | 0.432   | -0.653     | -0.993 | 0.535  |
| 6          | Moisture    | 0.039      | 0.032   | -0.091 | -0.028  | -0.004     | 0.033  | 0.041  |
| CUE        |             |            |         |        |         |            |        |        |
| 7          | CUE         | 0.191      | -0.439  | 0.322  | -0.042  | -0.434     | -0.534 | 1.000  |

## INNER MODEL

|              |           |            |           |           |
|--------------|-----------|------------|-----------|-----------|
| \$climate    |           |            |           |           |
|              | Estimate  | Std. Error | t value   | Pr(> t )  |
| Intercept    | -3.60e-16 | 0.051      | -7.05e-15 | 1.00e+00  |
| topography   | -1.27e-01 | 0.051      | -2.48e+00 | 0.014     |
| \$season     |           |            |           |           |
|              | Estimate  | Std. Error | t value   | Pr(> t )  |
| Intercept    | 3.17e-16  | 0.024      | 1.35e-14  | 1.00e+00  |
| topography   | -2.87e-01 | 0.024      | -1.21e+01 | 1.40e-28  |
| climate      | -8.79e-01 | 0.024      | -3.70e+01 | 2.81e-127 |
| \$texture    |           |            |           |           |
|              | Estimate  | Std. Error | t value   | Pr(> t )  |
| Intercept    | 3.59e-17  | 0.050      | 7.16e-16  | 1.00e+00  |
| topography   | -7.21e-02 | 0.051      | -1.42e+00 | 0.157     |
| season       | 2.15e-01  | 0.051      | 4.22e+00  | 0.000     |
| \$vegetation |           |            |           |           |

|            | Estimate  | Std. Error | t value   | Pr(> t ) |
|------------|-----------|------------|-----------|----------|
| Intercept  | 3.64e-16  | 0.031      | 1.18e-14  | 1.00e+00 |
| climate    | 9.34e-01  | 0.057      | 1.64e+01  | 8.19e-46 |
| season     | 1.62e-01  | 0.057      | 2.83e+00  | 4.85e-03 |
| \$soil     |           |            |           |          |
|            | Estimate  | Std. Error | t value   | Pr(> t ) |
| Intercept  | 1.41e-16  | 0.033      | 4.30e-15  | 1.00e+00 |
| season     | -3.17e-01 | 0.042      | -7.49e+00 | 4.87e-13 |
| texture    | -2.81e-01 | 0.034      | -8.36e+00 | 1.24e-15 |
| vegetation | 4.15e-01  | 0.042      | 9.89e+00  | 1.16e-20 |
| \$CUE      |           |            |           |          |
|            | Estimate  | Std. Error | t value   | Pr(> t ) |
| Intercept  | 5.03e-16  | 0.041      | 1.24e-14  | 1.00e+00 |
| climate    | -1.74e-01 | 0.101      | -1.73e+00 | 8.47e-02 |
| season     | -1.90e-01 | 0.077      | -2.48e+00 | 1.37e-02 |
| texture    | -3.16e-01 | 0.046      | -6.94e+00 | 1.72e-11 |
| vegetation | -5.10e-02 | 0.070      | -7.27e-01 | 4.68e-01 |
| soil       | -6.33e-01 | 0.066      | -9.66e+00 | 7.28e-20 |

#### CORRELATIONS BETWEEN LVs

|            | Topography | Climate | Season | Texture | Vegetation | Soil   | CUE    |
|------------|------------|---------|--------|---------|------------|--------|--------|
| Topography | 1.000      | -0.127  | -0.176 | -0.110  | -0.096     | -0.055 | 0.191  |
| Climate    | -0.127     | 1.000   | -0.843 | -0.210  | 0.798      | 0.713  | -0.439 |
| Season     | -0.176     | -0.843  | 1.000  | 0.227   | -0.625     | -0.641 | 0.322  |
| Texture    | -0.110     | -0.210  | 0.227  | 1.000   | -0.185     | -0.429 | -0.042 |
| Vegetation | -0.096     | 0.798   | -0.625 | -0.184  | 1.000      | 0.665  | -0.434 |
| Soil       | -0.055     | 0.713   | -0.640 | -0.429  | 0.665      | 1.000  | -0.534 |
| CUE        | 0.191      | -0.439  | 0.322  | -0.042  | -0.434     | -0.534 | 1.000  |

#### SUMMARY INNER MODEL

|            | Type       | R <sub>2</sub> | Block | Communality | Mean  | Redundancy | AVE   |
|------------|------------|----------------|-------|-------------|-------|------------|-------|
| Topography | Exogenous  | 0.000          | 0.573 |             | 0.000 |            | 0.573 |
| Climate    | Endogenous | 0.016          | 0.933 |             | 0.015 |            | 0.933 |
| Season     | Endogenous | 0.791          | 0.785 |             | 0.621 |            | 0.785 |
| Clay       | Endogenous | 0.057          | 1.715 |             | 0.041 |            | 1.715 |
| Soil       | Endogenous | 0.644          | 0.376 |             | 0.242 |            | 0.000 |
| Vegetation | Endogenous | 0.580          | 0.348 |             | 0.209 |            | 0.000 |
| CUE        | Endogenous | 0.388          | 1.000 |             | 0.388 |            | 1.000 |

| GOODNESS-OF-FIT |
|-----------------|
| [1] 0.493       |

#### TOTAL EFFECTS

|   | relationships            | direct | indirect | total  |
|---|--------------------------|--------|----------|--------|
| 1 | topography -> climate    | -0.127 | 0.000    | -0.127 |
| 2 | topography -> season     | -0.287 | 0.111    | -0.176 |
| 3 | topography -> clay       | -0.072 | -0.038   | -0.110 |
| 4 | topography -> vegetation | 0.000  | -0.147   | -0.147 |
| 5 | topography -> soil       | 0.000  | 0.026    | 0.026  |
| 6 | topography -> CUE        | 0.000  | 0.081    | 0.082  |
| 7 | climate -> season        | -0.879 | 0.000    | -0.879 |
| 8 | climate -> texture       | 0.000  | -0.189   | -0.187 |
| 9 | climate -> vegetation    | 0.934  | -0.142   | 0.792  |

|    |                       |        |        |        |
|----|-----------------------|--------|--------|--------|
| 10 | climate -> soil       | 0.000  | 0.660  | 0.660  |
| 11 | climate -> CUE        | -0.174 | -0.232 | -0.406 |
| 12 | season -> texture     | 0.215  | 0.000  | 0.215  |
| 13 | season -> vegetation  | 0.162  | 0.000  | 0.162  |
| 14 | season -> soil        | -0.317 | 0.007  | -0.310 |
| 15 | season -> CUE         | -0.190 | 0.120  | -0.070 |
| 16 | texture -> vegetation | 0.000  | 0.000  | 0.000  |
| 17 | texture -> soil       | -0.281 | 0.000  | -0.281 |
| 18 | texture -> CUE        | -0.316 | 0.178  | -0.138 |
| 19 | vegetation -> soil    | 0.415  | 0.000  | 0.415  |
| 20 | vegetation -> CUE     | -0.051 | -0.263 | -0.314 |
| 21 | soil -> CUE           | -0.633 | 0.000  | -0.633 |

---

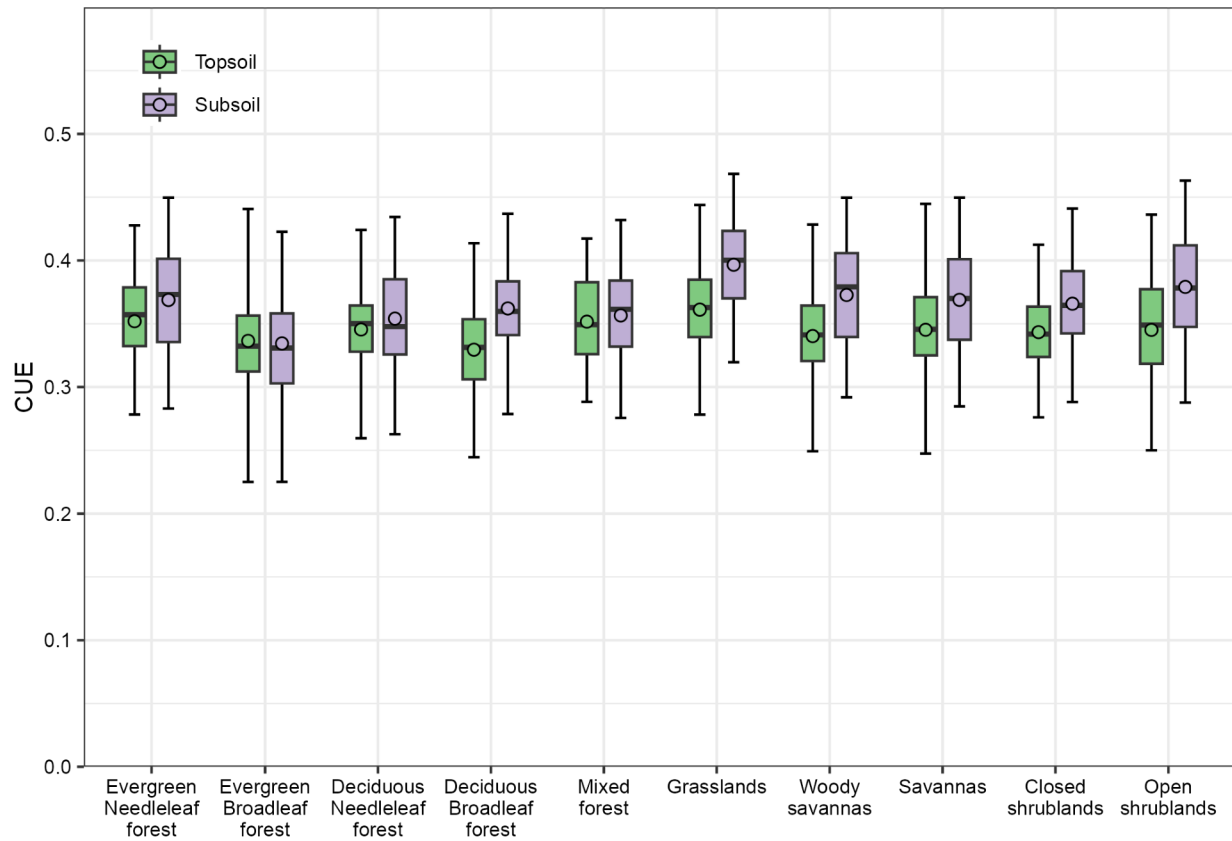

**Fig. S5** CUE values across biomes in both topsoils and subsoils. The boxes represent the first and the third quartiles. The line within the box represents the median. The whiskers represent the data range and points indicate individual values. The biomes are delineated using MODIS land-cover maps.

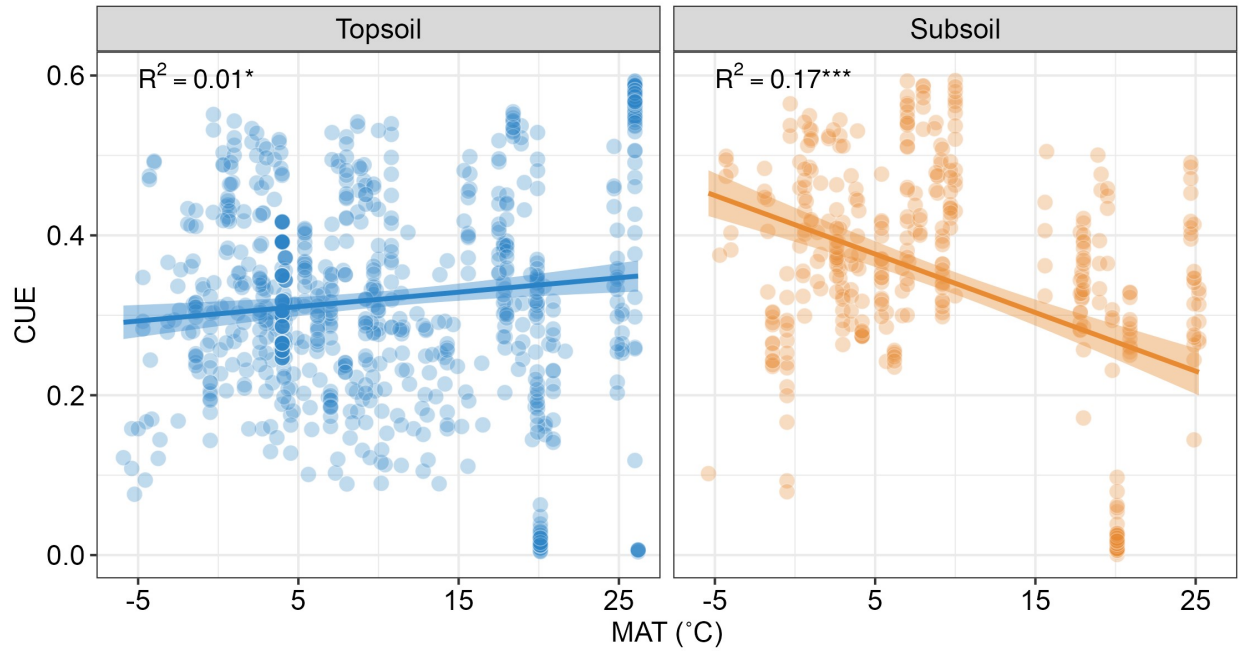

**Fig. S6** Relationships between CUE and mean annual temperature (MAT). Linear regressions depicting the relationship between CUE and MAT in topsoils and in subsoils. The dots correspond to individual values ( $n=814$  and  $379$  for topsoils and subsoils, respectively). \* denotes  $P < 0.05$ ; \*\*\* indicates  $P < 0.001$ .



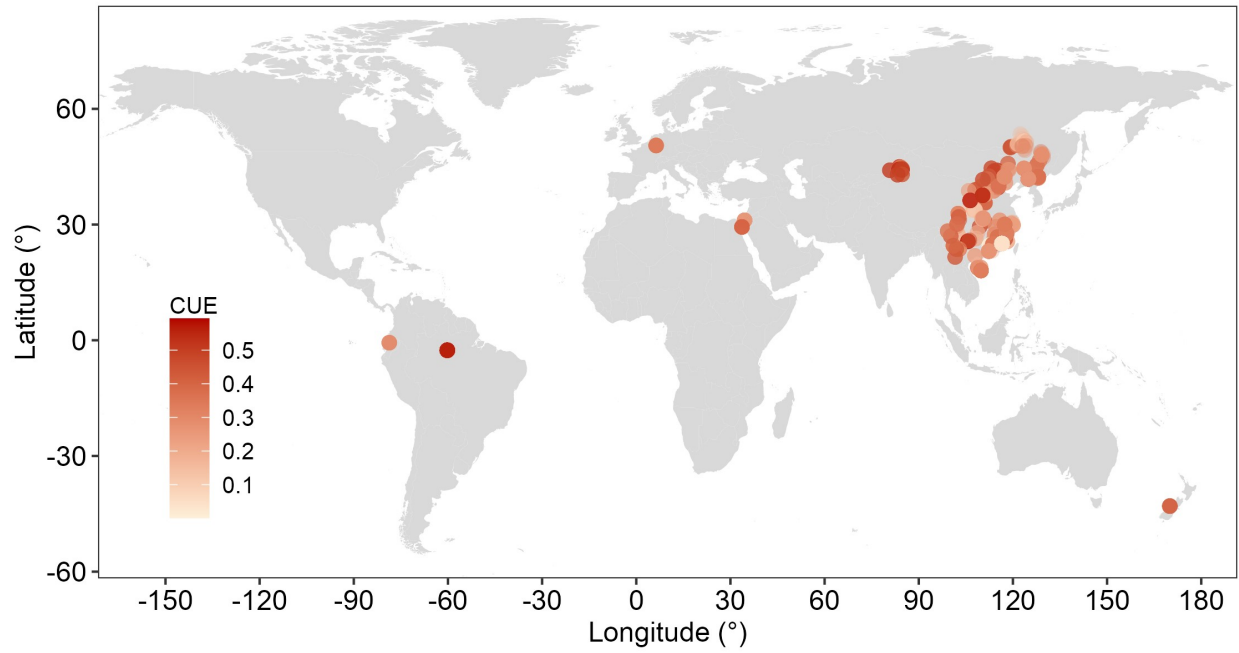

**Fig. S7** Global distribution of microbial carbon use efficiency (CUE) estimated with stoichiometric modeling. In total, 1193 data points across 103 sites.

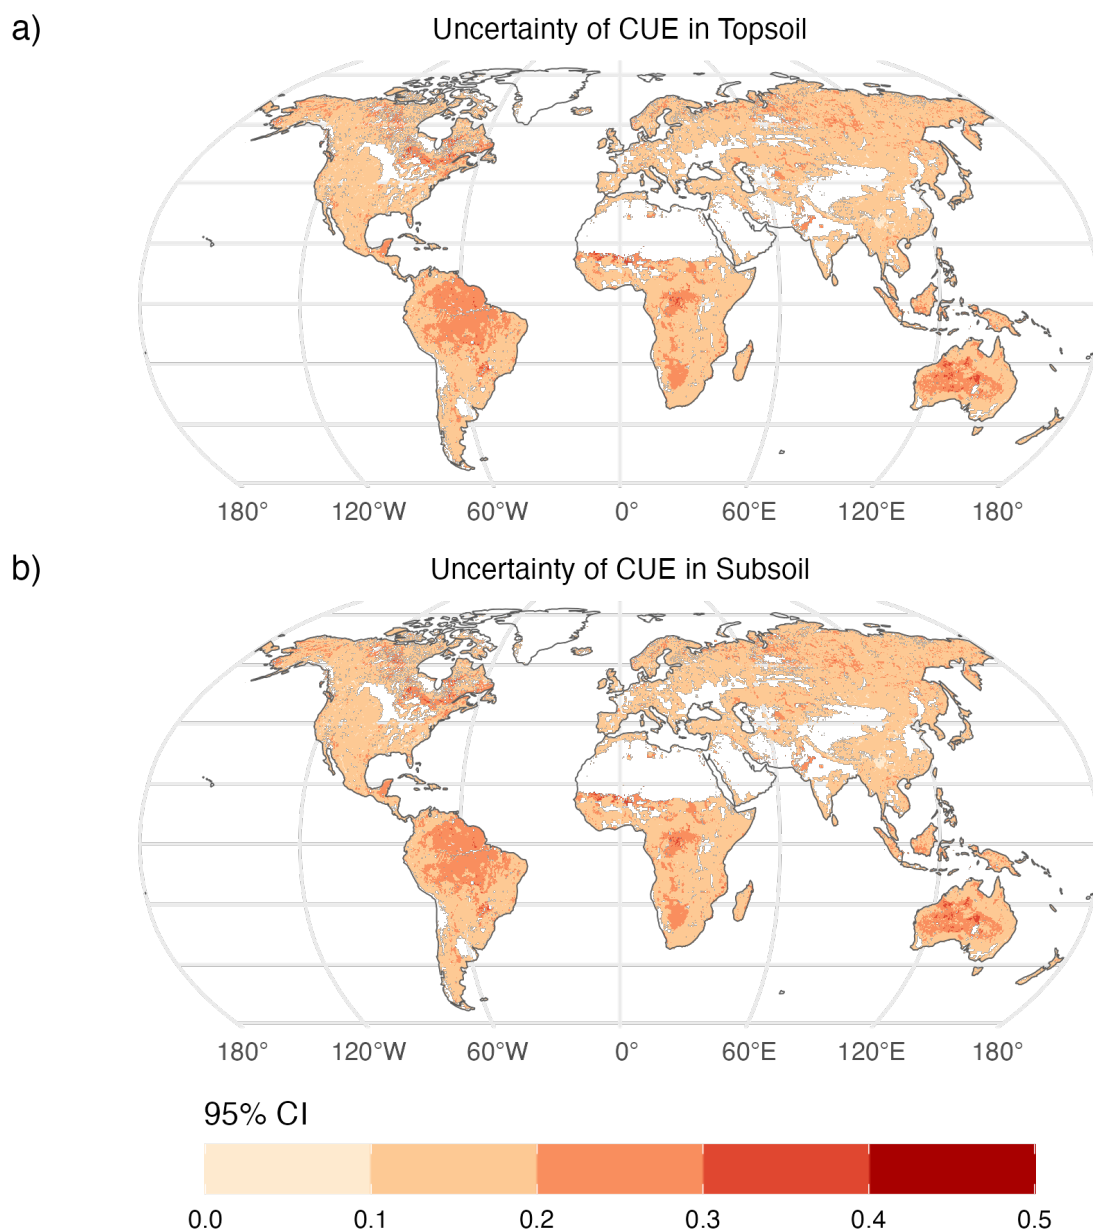

**Fig. S8** Global distribution of the uncertainty of prediction of CUE in a) topsoil and b) subsoil. Uncertainty is calculated by mean value of 100 times model 95% confidence interval (CI). All projections are displayed on a  $0.25^\circ \times 0.25^\circ$  scale of latitude and longitude. Areas of water, permanent wetlands, cropland, urban/built-up areas, and snow/ice areas were excluded from projections.

**Table S3** Description of data from 21 potential predictors of microbial carbon use efficiency (CUE)

| Factors    | ID | Variable                                          | Unit                                | Source                                                                                                                                                          | Period/Layer | Reference                |
|------------|----|---------------------------------------------------|-------------------------------------|-----------------------------------------------------------------------------------------------------------------------------------------------------------------|--------------|--------------------------|
| Climate    | 1  | Mean annual temperature (MAT)                     | °C                                  | WorldClim2                                                                                                                                                      | 1970-2000    | Fick and Hijmans, 2017   |
|            | 2  | Mean annual precipitation (MAP)                   | mm                                  | WorldClim2                                                                                                                                                      | 1970-2000    | Fick and Hijmans, 2017   |
|            | 3  | Temperature seasonality (TS)                      | 10 <sup>-2</sup> °C                 | WorldClim2                                                                                                                                                      | 1970-2000    | Fick and Hijmans, 2017   |
|            | 4  | Precipitation seasonality (PS)                    | %                                   | WorldClim2                                                                                                                                                      | 1970-2000    | Fick and Hijmans, 2017   |
|            | 5  | Aridity index (AI)                                | -                                   | global-aridity-index-and-potential-evapotranspiration-climate-database-v2/                                                                                      | 1970-2000    | Trabucco and Zomer, 2018 |
| Vegetation | 6  | Shannon diversity enhanced vegetation index (EVI) | -                                   | <a href="http://www.earthenv.org/texture">http://www.earthenv.org/texture</a>                                                                                   | -            | Tuanmu and Jetz, 2015    |
|            | 7  | Leaf area index (LAI)                             | m <sup>2</sup> m <sup>-2</sup>      | <a href="https://daac.ornl.gov/cgi-bin/dsviewer.pl?ds_id=1653">https://daac.ornl.gov/cgi-bin/dsviewer.pl?ds_id=1653</a>                                         | 1981-2015    | Mao and Yan, 2019        |
|            | 8  | Gross primary production (GPP)                    | g C m <sup>-2</sup> d <sup>-1</sup> | <a href="https://daac.ornl.gov/cgi-bin/dsviewer.pl?ds_id=1789">https://daac.ornl.gov/cgi-bin/dsviewer.pl?ds_id=1789</a>                                         | 1982-2016    | Madani and Parazoo, 2020 |
|            | 9  | Aboveground biomass (AGB)                         | Mg C ha <sup>-1</sup>               | <a href="https://daac.ornl.gov/VEGETATION/guides/Global_Maps_C_Density_2010.html">https://daac.ornl.gov/VEGETATION/guides/Global_Maps_C_Density_2010.html</a>   | 2010         | Spawn et al., 2020       |
|            | 10 | Belowground biomass (BGB)                         | Mg C ha <sup>-1</sup>               | <a href="https://daac.ornl.gov/VEGETATION/guides/Global_Maps_C_Density_2010.html">https://daac.ornl.gov/VEGETATION/guides/Global_Maps_C_Density_2010.html</a>   | 2010         | Spawn et al., 2020       |
| Topography | 11 | Root depth                                        | m                                   | <a href="https://wci.earth2observe.eu/thredds/catalog/usc/root-depth/catalog.html">https://wci.earth2observe.eu/thredds/catalog/usc/root-depth/catalog.html</a> | -            | Fan et al., 2017         |
|            | 12 | Elevation                                         | m                                   | <a href="http://www.earthenv.org/topography">http://www.earthenv.org/topography</a>                                                                             | -            | Amatulli et al., 2018    |
|            | 13 | Slope                                             | degrees                             | <a href="http://www.earthenv.org/topography">http://www.earthenv.org/topography</a>                                                                             | -            | Amatulli et al., 2018    |
| Soil       | 14 | Depth to bedrock                                  | cm (≤ 200)                          | <a href="https://files.isric.org/soilgrids/former/2017-03-10/data/">https://files.isric.org/soilgrids/former/2017-03-10/data/</a>                               | -            | Hengl et al., 2017       |
|            | 15 | Soil clay fraction                                | % of weight                         | <a href="http://globalchange.bnu.edu.cn/research/soilw#download">http://globalchange.bnu.edu.cn/research/soilw#download</a>                                     | 0-100 cm     |                          |
|            | 16 | Soil silt fraction                                | % of weight                         | <a href="http://globalchange.bnu.edu.cn/research/soilw#download">http://globalchange.bnu.edu.cn/research/soilw#download</a>                                     | 0-100 cm     |                          |
|            | 17 | Soil sand fraction                                | % of weight                         | <a href="http://globalchange.bnu.edu.cn/research/soilw#download">http://globalchange.bnu.edu.cn/research/soilw#download</a>                                     | 0-100 cm     |                          |
|            | 18 | Soil bulk density (BD)                            | g cm <sup>-3</sup>                  | <a href="http://globalchange.bnu.edu.cn/research/soilw#download">http://globalchange.bnu.edu.cn/research/soilw#download</a>                                     | 0-100 cm     |                          |
|            | 19 | Soil moisture                                     | % of volume                         | <a href="http://globalchange.bnu.edu.cn/research/soilw#download">http://globalchange.bnu.edu.cn/research/soilw#download</a>                                     | 0-100 cm     |                          |
|            | 20 | Cation exchange capacity (CEC)                    | cmol kg <sup>-1</sup>               | <a href="http://globalchange.bnu.edu.cn/research/soilw#download">http://globalchange.bnu.edu.cn/research/soilw#download</a>                                     | 0-100 cm     |                          |
|            | 21 | pH in H <sub>2</sub> O                            | -                                   | <a href="http://globalchange.bnu.edu.cn/research/soilw#download">http://globalchange.bnu.edu.cn/research/soilw#download</a>                                     | 0-100 cm     |                          |

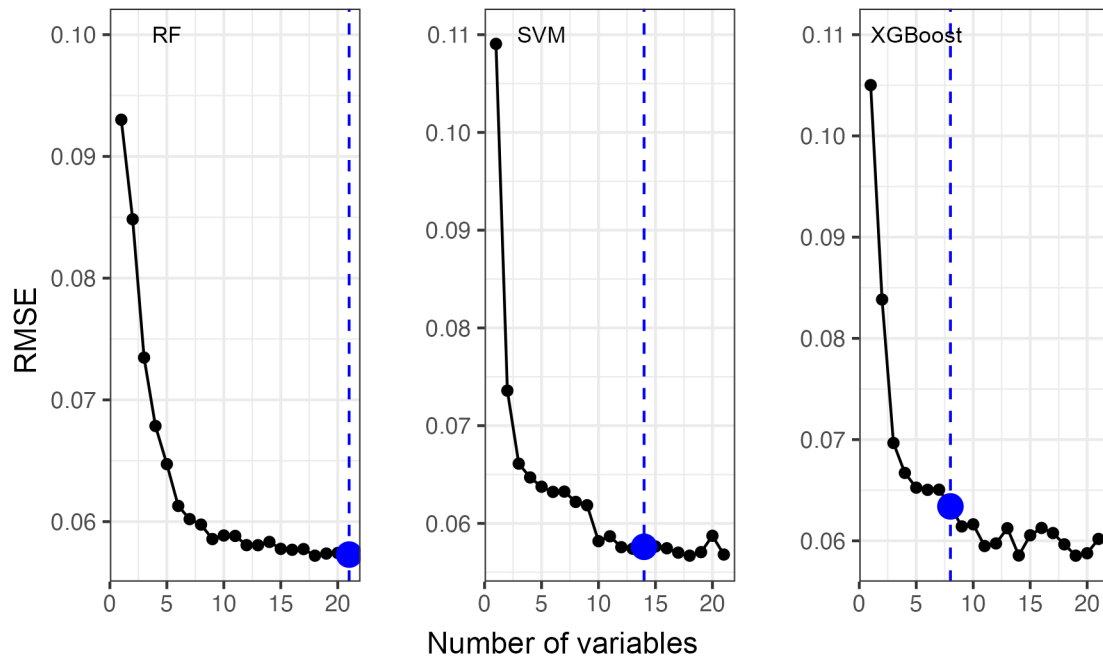

**Fig. S9** Results of the recursive feature elimination method in topsoils, which was used to prevent the overfitting of the Random Forest (RF) model, Support Vector Machine (SVM), and Extreme Gradient-Boosting (XGBoost) model in predicting microbial carbon use efficiency (CUE). Blue dots and lines represent the optimal numbers of predictor variables used to train machine-learning models. RMSE denotes the root mean square error.

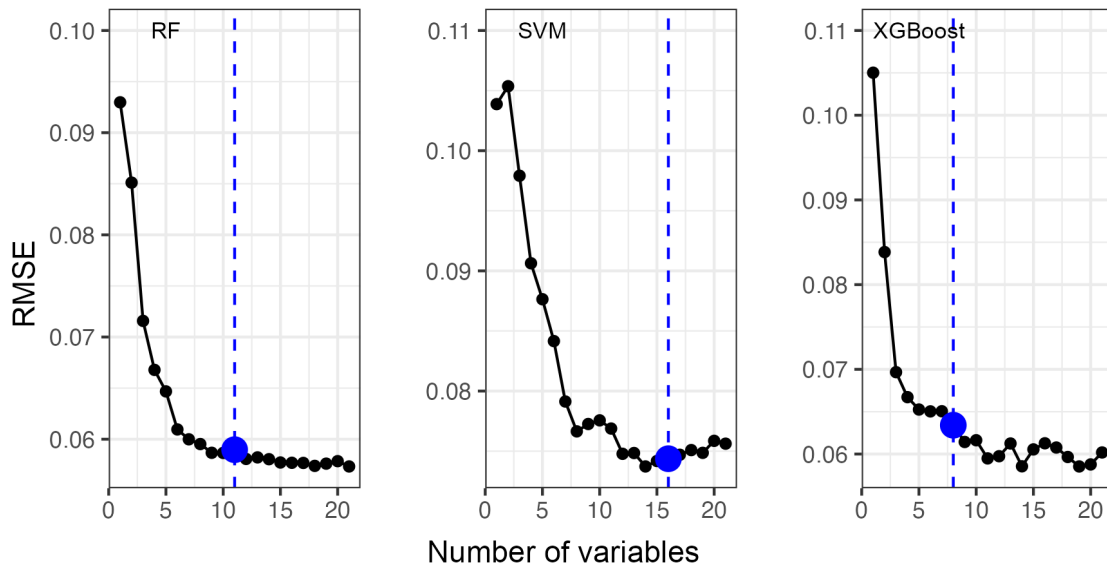

**Fig. S10** Results of the recursive feature elimination method in subsoils, which was used to prevent the overfitting of the Random Forest (RF) model, Support Vector Machine (SVM), and Extreme Gradient-Boosting (XGBoost) model in predicting microbial carbon use efficiency (CUE). Blue dots and lines represent the optimal numbers of predictor variables used to train machine-learning models. RMSE denotes the root mean square error.

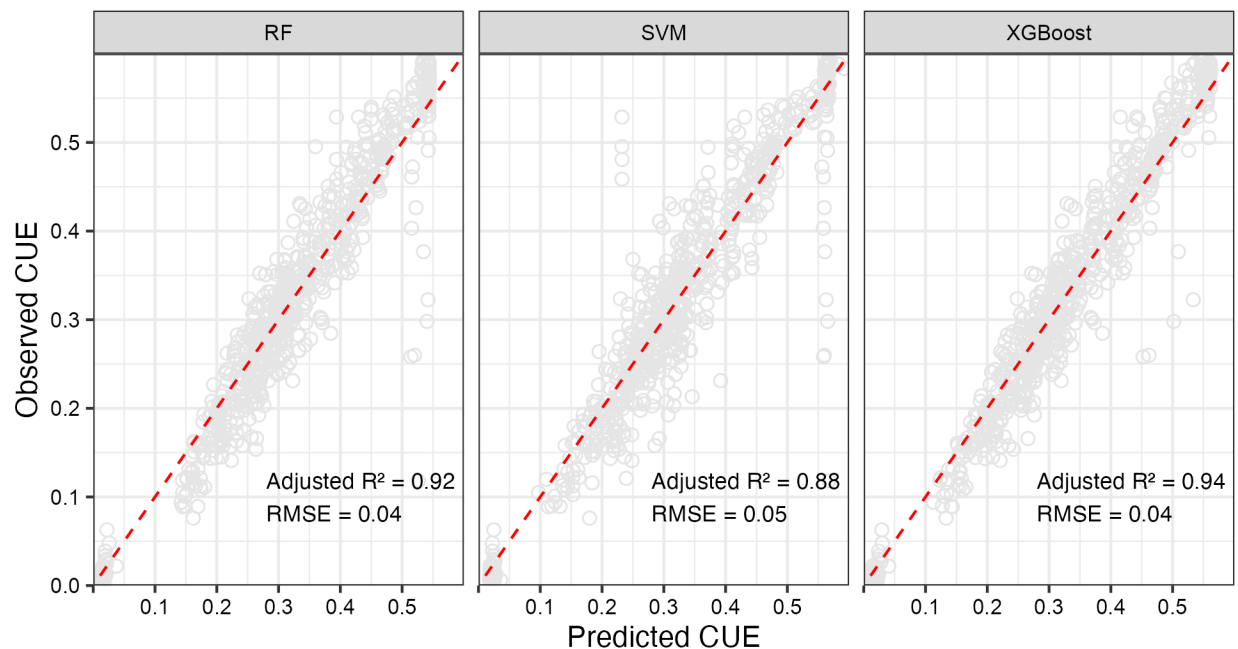

**Fig. S11** Performance of the Random Forest (RF) model, Support Vector Machine (SVM), and Extreme Gradient-Boosting (XGBoost) model in predicting microbial carbon use efficiency (CUE) in topsoils. The red dashed lines represent the 1:1 line. Adjusted  $R^2$  indicates the coefficient of determination. RMSE denotes the root mean squared error. The optimal model is characterized by the maximum  $R^2$  and the minimum RMSE.

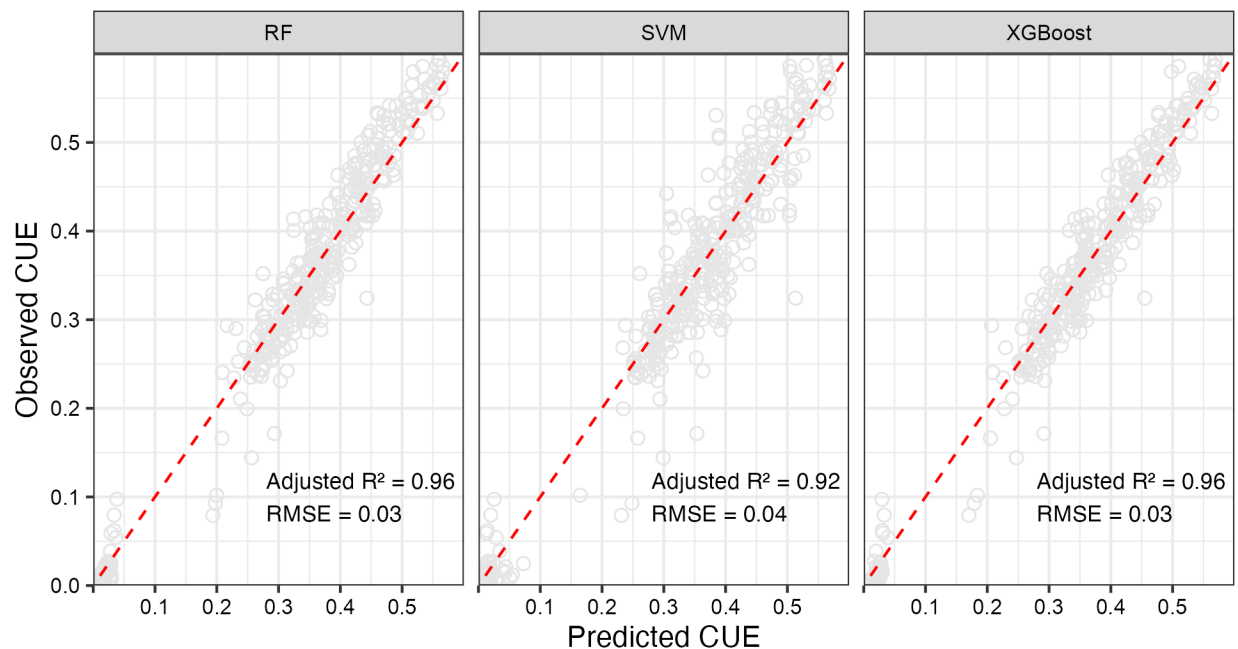

**Fig. S12** Performance of the Random Forest (RF) model, Support Vector Machine (SVM), and Extreme Gradient-Boosting (XGBoost) model in predicting microbial carbon use efficiency (CUE) in subsoils. The red dashed lines represent the 1:1 line. Adjusted  $R^2$  indicates the coefficient of determination. RMSE denotes the root mean squared error. The optimal model is characterized by the maximum  $R^2$  and the minimum RMSE.

**Table S4** Results of recursive feature elimination method in subsoils, which was used to prevent the overfitting of the Random Forest (RF) model, support vector machine (SVM) model, Extreme Gradient-Boosting (XGBoost) model in predicting microbial carbon use efficiency (CUE) in topsoils

| Explanatory variables             | RF   | SVM  | XGBoost |
|-----------------------------------|------|------|---------|
| Mean annual temperature (MAT)     | ✓    | ✓    | ✓       |
| Mean annual precipitation (MAP)   | ✓    | ✓    | ✓       |
| Temperature seasonality (TS)      | ✓    | ✓    | ✓       |
| Precipitation seasonality (PS)    | ✓    | ✓    | ✓       |
| Aridity index (AI)                | ✓    | ✓    | ✓       |
| Elevation                         | ✓    | ✓    | ✓       |
| Slope                             | ✓    | ✓    | ✓       |
| pH                                | ✓    | ✓    | ✓       |
| Soil moisture                     | ✓    | ✓    | ✓       |
| Soil bulk density (BD)            | ✓    | ✓    | ✓       |
| Cation exchange capacity (CEC)    | ✓    | ✓    | ✓       |
| Soil sand content                 | ✓    | ✓    | ✓       |
| Soil clay content                 | ✓    | ✓    | ✓       |
| soil silt content                 | ✓    | ✓    | ✓       |
| RootDepth                         | ✓    | ✓    |         |
| Bedrock                           | ✓    | ✓    | ✓       |
| Aboveground biomass (AGB)         | ✓    | ✓    | ✓       |
| Belowground biomass (BGB)         | ✓    | ✓    | ✓       |
| Leaf area index (LAI)             | ✓    | ✓    | ✓       |
| Shannon enhanced vegetation index | ✓    | ✓    | ✓       |
| Gross primary production (GPP)    | ✓    | ✓    |         |
| Adjust R <sup>2</sup>             | 0.92 | 0.88 | 0.94    |
| RMSE                              | 0.04 | 0.05 | 0.04    |



**Table S5** Results of recursive feature elimination method in subsoils, which was used to prevent the overfitting of the Random Forest (RF) model, support vector machine (SVM) model, Extreme Gradient-Boosting (XGBoost) model in predicting microbial carbon use efficiency (CUE) in subsoils

| Explanatory variables             | RF   | SVM  | XGBoost |
|-----------------------------------|------|------|---------|
| Mean annual temperature (MAT)     | ✓    | ✓    | ✓       |
| Mean annual precipitation (MAP)   | ✓    | ✓    |         |
| Temperature seasonality (TS)      | ✓    | ✓    | ✓       |
| Precipitation seasonality (PS)    |      | ✓    |         |
| Aridity index (AI)                |      | ✓    |         |
| Elevation                         |      | ✓    | ✓       |
| Slope                             | ✓    |      |         |
| pH                                | ✓    | ✓    | ✓       |
| Soil moisture                     | ✓    |      |         |
| Soil bulk density (BD)            |      | ✓    |         |
| Cation exchange capacity (CEC)    | ✓    | ✓    | ✓       |
| Soil sand content                 | ✓    | ✓    |         |
| Soil clay content                 | ✓    |      | ✓       |
| soil silt content                 |      | ✓    |         |
| RootDepth                         |      |      |         |
| Bedrock                           |      | ✓    |         |
| Aboveground biomass (AGB)         |      | ✓    | ✓       |
| Belowground biomass (BGB)         |      | ✓    |         |
| Leaf area index (LAI)             | ✓    | ✓    | ✓       |
| Shannon enhanced vegetation index | ✓    | ✓    |         |
| Gross primary production (GPP)    |      |      |         |
| Adjust R <sup>2</sup>             | 0.96 | 0.92 | 0.96    |
| RMSE                              | 0.03 | 0.04 | 0.03    |

### **Supplementary References:**

Amatulli, G, Domisch, S, Tuanmu, M-N, Parmentier, B, Ranipeta, A, Malczyk, J, Jetz, W, 2018. A suite of global, cross-scale topographic variables for environmental and biodiversity modeling. Scientific Data 5, 180040. <https://doi.org/10.1038/sdata.2018.40>

Chen, L, Xue, Y, Wang, N, Gao, H, Hu, G, Liu, J e, Cao, L, Zhou, Z, 2025. Soil properties influence the distribution and diversity of plant communities in the desert-loess transition zone. CATENA 254, 108976. <https://doi.org/10.1016/j.catena.2025.108976>

Churkina, G, Running, S W, 1998. Contrasting Climatic Controls on the Estimated Productivity of Global Terrestrial Biomes. Ecosystems 1, 206-215. <https://doi.org/10.1007/s100219900016>

Cui, Y, Peng, S, Rillig, M C, Camenzind, T, Delgado-Baquerizo, M, Terrer, C, Xu, X, et al., 2025. Global patterns of nutrient limitation in soil microorganisms. Proceedings of the National Academy of Sciences 122, e2424552122. <https://doi.org/10.1073/pnas.2424552122>

Daly, C, Halbleib, M, Smith, J I, Gibson, W P, Doggett, M K, Taylor, G H, Curtis, J, Pasteris, P P, 2008. Physiographically sensitive mapping of climatological temperature and precipitation across the conterminous United States. International Journal of Climatology 28, 2031-2064. <https://doi.org/10.1002/joc.1688>

Daniels, W L, 2016. The Nature and Properties of Soils, 15th Edition Ray R. Weil and Nyle C. Brady. Pearson Press, Upper Saddle River NJ, 2017. 1086 p. \$164.80. ISBN-

10: 0-13-325448-8; ISBN-13: 978-0-13-325448-8. Also available as eText for \$67.99.

Soil Science Society of America Journal 80, 1428-1428.

<https://doi.org/10.2136/sssaj2016.0005br>

Domeignoz-Horta, L A, Cappelli, S L, Shrestha, R, Gerin, S, Lohila, A K, Heinonsalo, J, Nelson, D B, et al., 2024. Plant diversity drives positive microbial associations in the rhizosphere enhancing carbon use efficiency in agricultural soils. Nature Communications 15, 8065. <https://doi.org/10.1038/s41467-024-52449-5>

Fan, Y, Miguez-Macho, G, Jobbágy, E G, Jackson, R B, Otero-Casal, C, 2017. Hydrologic regulation of plant rooting depth. Proceedings of the National Academy of Sciences 114, 10572-10577. <https://doi.org/10.1073/pnas.1712381114>

Fick, S E, Hijmans, R J, 2017. WorldClim 2: new 1-km spatial resolution climate surfaces for global land areas. International Journal of Climatology 37, 4302-4315. <https://doi.org/10.1002/joc.5086>

Hajek, O L, Knapp, A K, 2022. Shifting seasonal patterns of water availability: ecosystem responses to an unappreciated dimension of climate change. New Phytologist 233, 119-125. <https://doi.org/10.1111/nph.17728>

Han, W, Chen, L, Su, X, Liu, D, Jin, T, Shi, S, Li, T, Liu, G, 2022. Effects of Soil Physico-Chemical Properties on Plant Species Diversity Along an Elevation Gradient Over Alpine Grassland on the Qinghai-Tibetan Plateau, China. Frontiers in Plant Science Volume 13 - 2022, <https://doi.org/10.3389/fpls.2022.822268>

He, Y, Wang, X, Wang, K, Tang, S, Xu, H, Chen, A, Ciais, P, Li, X, Peñuelas, J, Piao, S, 2021. Data-driven estimates of global litter production imply slower vegetation carbon turnover. *Global Change Biology* 27, 1678-1688. <https://doi.org/10.1111/gcb.15515>

Helman, D, Osem, Y, Yakir, D, Lensky, I M, 2017. Relationships between climate, topography, water use and productivity in two key Mediterranean forest types with different water-use strategies. *Agricultural and Forest Meteorology* 232, 319-330. <https://doi.org/10.1016/j.agrformet.2016.08.018>

Hengl, T, Mendes de Jesus, J, Heuvelink, G B M, Ruiperez Gonzalez, M, Kilibarda, M, Blagotić, A, Shangguan, W, et al., 2017. SoilGrids250m: Global gridded soil information based on machine learning. *PLOS ONE* 12, e0169748. <https://doi.org/10.1371/journal.pone.0169748>

Luo, Z, Wang, G, Wang, E, 2019. Global subsoil organic carbon turnover times dominantly controlled by soil properties rather than climate. *Nature Communications* 10, 3688. <https://doi.org/10.1038/s41467-019-11597-9>

Mackie-Dawson, L A, Mullins, C E, Goss, M J, Court, M N, Fitzpatrick, E A, 1989. Seasonal changes in the structure of clay soils in relation to soil management and crop type. II. Effects of cultivation and cropping at Compton Beauchamp. *Journal of Soil Science* 40, 283-292. <https://doi.org/10.1111/j.1365-2389.1989.tb01273.x>

Manzoni, S, Taylor, P, Richter, A, Porporato, A, Ågren, G I, 2012. Environmental and stoichiometric controls on microbial carbon-use efficiency in soils. *New Phytologist* 196, 79-91. <https://doi.org/10.1111/j.1469-8137.2012.04225.x>

Mao, J, Yan, B, 2019. Global Monthly Mean Leaf Area Index Climatology, 1981-2015 (Version 1). ORNL Distributed Active Archive Center

<https://doi.org/10.3334/ORNLDAAAC/1653>

Moustakis, Y, Onof, C J, Paschalis, A, 2020. Atmospheric convection, dynamics and topography shape the scaling pattern of hourly rainfall extremes with temperature globally. Communications Earth & Environment 1, 11. <https://doi.org/10.1038/s43247-020-0003-0>

Peel, M C, Finlayson, B L, McMahon, T A, 2007. Updated world map of the Köppen-Geiger climate classification. Hydrol. Earth Syst. Sci. 11, 1633-1644.

<https://doi.org/10.5194/hess-11-1633-2007>

Potter, C, Boriah, S, Steinbach, M, Kumar, V, Klooster, S, 2008. Terrestrial vegetation dynamics and global climate controls. Climate Dynamics 31, 67-78.

<https://doi.org/10.1007/s00382-007-0339-5>

R. C, C, 1941. Factors of Soil Formation, a System of Quantitative Pedology. Agronomy Journal 33, 857-858. <https://doi.org/10.2134/agronj1941.00021962003300090016x>

Roe, G H, 2005. OROGRAPHIC PRECIPITATION. Annual Review of Earth and Planetary Sciences 33, 645-671.

<https://doi.org/10.1146/annurev.earth.33.092203.122541>

Sarkar, S, Das, D K, Singh, A, Laik, R, Singh, S K, van Es, H M, Krishnan, K, et al., 2024. Seasonal variations in soil characteristics control microbial respiration and carbon

use under tree plantations in the middle gangetic region. *Heliyon* 10, e35593.

<https://doi.org/10.1016/j.heliyon.2024.e35593>

Soinne, H, Keskinen, R, Tähtikarhu, M, Kuva, J, Hyväluoma, J, 2023. Effects of organic carbon and clay contents on structure-related properties of arable soils with high clay content. *European Journal of Soil Science* 74, e13424.

<https://doi.org/10.1111/ejss.13424>

Spawn, S A, Gibbs, H K, 2020. Global Aboveground and Belowground Biomass Carbon Density Maps for the Year 2010 (Version 1). ORNL Distributed Active Archive Center

<https://doi.org/10.3334/ORNLDAAAC/1763>

Tuanmu, M-N, Jetz, W, 2015. A global, remote sensing-based characterization of terrestrial habitat heterogeneity for biodiversity and ecosystem modelling. *Global Ecology and Biogeography* 24, 1329-1339. <https://doi.org/10.1111/geb.12365>

Wuest, S B, 2015. Seasonal Variation in Soil Bulk Density, Organic Nitrogen, Available Phosphorus, and pH. *Soil Science Society of America Journal* 79, 1188-1197.

<https://doi.org/10.2136/sssaj2015.02.0066>

Yao, Z, Xin, Y, Yang, L, Zhao, L, Ali, A, 2022. Precipitation and temperature regulate species diversity, plant coverage and aboveground biomass through opposing mechanisms in large-scale grasslands. *Frontiers in Plant Science* Volume 13 - 2022,

<https://doi.org/10.3389/fpls.2022.999636>

Zhang, X, Zhang, W-C, Wu, W, Liu, H-B, 2023. Horizontal and vertical variation of soil clay content and its controlling factors in China. Science of The Total Environment 864, 161141. <https://doi.org/10.1016/j.scitotenv.2022.161141>

Zhang, Z, Li, X, Ju, W, Zhou, Y, Cheng, X, 2022. Improved estimation of global gross primary productivity during 1981–2020 using the optimized P model. Science of The Total Environment 838, 156172. <https://doi.org/10.1016/j.scitotenv.2022.156172>

Zomer, R J, Xu, J, Trabucco, A, 2022. Version 3 of the Global Aridity Index and Potential Evapotranspiration Database. Scientific Data 9, 409. <https://doi.org/10.1038/s41597-022-01493-1>
